# Supplementary material for: Diversification versus Specialization in Complex Ecosystems
Source: PubMed Central journal article supplement (PMC4226558; doi:10.1371/journal.pone.0112525), 2014-11-10
Supplement: pone.0112525.s002.pdf [file pone.0112525.s002.pdf]

# Supplementary Information

## Diversification versus specialization in complex ecosystems

Riccardo Di Clemente<sup>1,2\*</sup>, Guido L. Chiarotti<sup>1</sup>, Matthieu Cristelli<sup>1</sup>, Andrea Tacchella<sup>1,3</sup>, & Luciano Pietronero<sup>1,3,4</sup>

<sup>1</sup>*Istituto dei Sistemi complessi ISC-CNR UOS Sapienza, Piazzale A. Moro 5, Roma Italy*

<sup>2</sup>*IMT Institute for Advanced Studies Lucca, Piazza S. Ponziano 6, Lucca, Italy*

<sup>3</sup>*Sapienza, Università di Roma, Piazzale A. Moro 5 Roma Italy.*

<sup>4</sup>*London Institute for Mathematical Sciences, 35a South St, Mayfair London United Kingdom.*

---

\*Corresponding author: *E-mail address:* riccardo.diclemente@roma1.infn.it

## **S.1 Data specification**

### **S.1.1 BICS hierarchical Classification system**

The Bloomberg Industry Classification Systems (BICS) is a proprietary hierarchical classification system, which classifies firms' general business activities.

BICS for stock companies contains 10 *macro* sectors, which represent the broadest classification of general business activities. Each sector is further broken down into a hierarchical system of sectors (up to 8 levels of detail), which are classified into more narrowly defined business activities. The whole classification system counts up to 2294 unique sectors. Each *macro* sector is defined by a code composed by two digits. Sectors (or subsectors) are hierarchically defined by attaching further couples of digits to a parent element code. The deepest sector is defined by a 16-digits code. The figure S1 shows the first two levels of the Bloomberg BICS stocks hierarchical classification system for stock companies. The figure S2 shows the hierarchical tree system of BICS.

### **S.1.2 Dataset**

The Bloomberg platform collects data about firms' revenues categorized using BICS. The data used in this work have been downloaded from Bloomberg platform on May 2013. The data contains information on annual revenues of 38274 traded firms broken down in 2294 sectors. The dataset covers 99 stock markets. Each firm is associated to its country of domicile, as reported by Bloomberg. the country of domicile is the country where the firm senior management is established legally. All the analyses have been performed on countries where at least 100 traded companies are domiciled. Those countries are listed in Table S1.

| Level 1 |                        | Level 2 |                               |
|---------|------------------------|---------|-------------------------------|
| CODE    | Macro Sector           | CODE    | First Level Microsector       |
| 10      | Communications         | 1010    | Media Content                 |
|         |                        | 1011    | Telecom                       |
| 11      | Consumer Discretionary | 1110    | Apparel & Textile Products    |
|         |                        | 1111    | Automotive                    |
|         |                        | 1112    | Consumer Discretionary Srvc   |
|         |                        | 1113    | Distributors                  |
|         |                        | 1114    | Home & Office Products        |
|         |                        | 1115    | Leisure Products              |
|         |                        | 1116    | Recreation Facilities & Srvc  |
|         |                        | 1117    | Retail Discretionary          |
|         |                        | 1118    | Travel, Lodging & Dining      |
| 12      | Consumer Staples       | 1210    | Consumer Products             |
|         |                        | 1211    | Dist/Whsl - Consumer Staples  |
|         |                        | 1212    | Retail Staples                |
| 13      | Energy                 | 1310    | Oil, Gas & Coal               |
|         |                        | 1311    | Renewable Energy              |
| 14      | Financials             | 1410    | Asset Management              |
|         |                        | 1411    | Banking                       |
|         |                        | 1412    | Institutional Financial Srvc  |
|         |                        | 1413    | Insurance                     |
|         |                        | 1414    | Real Estate Oper & Srvc       |
|         |                        | 1415    | REIT                          |
| 15      | Health Care            | 1416    | Specialty Finance             |
|         |                        | 1510    | Biotech & Pharma              |
| 16      | Industrials            | 1511    | Health Care Facilities/Srvc   |
|         |                        | 1512    | Medical Equipment/Devices     |
|         |                        | 1610    | Aerospace & Defense           |
|         |                        | 1611    | Electrical Equipment          |
|         |                        | 1612    | Engineering & Const Srvc      |
|         |                        | 1613    | Industrial Distribution       |
|         |                        | 1614    | Machinery                     |
|         |                        | 1615    | Manufactured Goods            |
|         |                        | 1616    | Transportation & Logistics    |
| 17      | Materials              | 1617    | Transportation Equipment      |
|         |                        | 1618    | Waste&Envrnmnt Srvc Equip&Fac |
|         |                        | 1710    | Chemicals                     |
|         |                        | 1711    | Construction Materials        |
|         |                        | 1712    | Containers & Packaging        |
|         |                        | 1713    | Forest & Paper Products       |
| 18      | Technology             | 1714    | Iron & Steel                  |
|         |                        | 1715    | Metals & Mining               |
|         |                        | 1810    | Design, Mfg & Distribution    |
|         |                        | 1811    | Hardware                      |
|         |                        | 1812    | Semiconductors                |
| 19      | Utilities              | 1813    | Software                      |
|         |                        | 1814    | Technology Services           |
|         |                        | 1910    | Utilities                     |

Figure S1: first two levels of the Bloomberg BICS stocks hierarchical Classification system for stock companies.

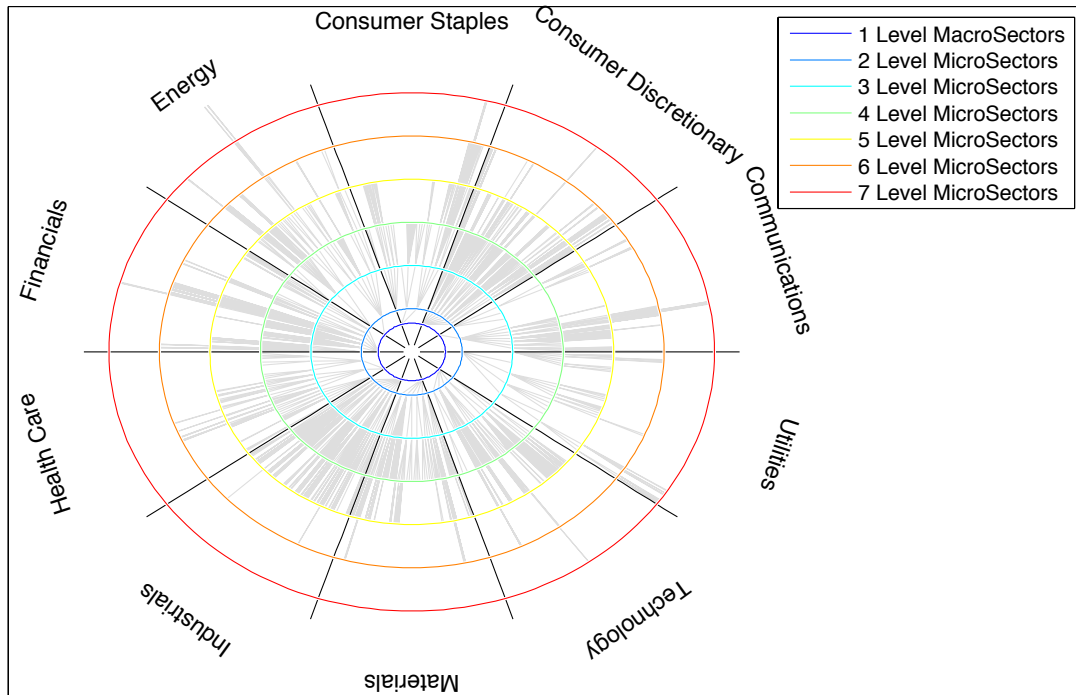

Figure S2: The Figure shows the reconstruction of BICS hierarchical tree system with its 2294 hierarchical Sectors. The colored lines show the classification levels.

### S.1.2.1 Data sanitation

We organize our data in a firm-sector rectangular matrix. Most of the elements of this matrix are 0s. We perform various data sanitation procedures in order to extract relevant information from such matrix.

From a total of 216888 non-0 entries we eliminate 7333 negative revenues, since their meaning appears unclear. In particular we notice an abnormal number of repeated identical values, which clusterize on a national basis but span on different firms. The dataset provides for each subsector the aggregate of the firms' revenues on that particular subsector plus the sum of the revenues of the full hierarchy of subsectors below it. We perform the necessary subtractions to ensure that only

| Country | # Companies | Country | #Companies |
|---------|-------------|---------|------------|
| USA     | 4415        | SWE     | 272        |
| JPN     | 3366        | POL     | 250        |
| CHN     | 3112        | ITA     | 245        |
| TWB     | 1433        | CHE     | 231        |
| KOR     | 1341        | GRC     | 213        |
| IND     | 1338        | LKA     | 210        |
| HKG     | 1115        | ZAF     | 198        |
| CAN     | 1035        | SRB     | 176        |
| GBR     | 970         | PHL     | 170        |
| AUS     | 834         | EGY     | 154        |
| MYS     | 794         | CHL     | 154        |
| DEU     | 620         | KWT     | 153        |
| VNM     | 605         | UKR     | 152        |
| RUS     | 567         | DNK     | 142        |
| SGP     | 554         | JOR     | 140        |
| THA     | 483         | NOR     | 135        |
| IDN     | 439         | ESP     | 122        |
| FRA     | 437         | NDL     | 118        |
| ISR     | 406         | PAK     | 115        |
| TUR     | 297         | PER     | 113        |
| BRA     | 276         | SAU     | 109        |

Table S1: Countries where at least 100 traded companies are domiciled.

the pertaining revenue is assigned to each subsector.
